# Supplementary material for: MiXcan: a framework for cell-type-aware transcriptome-wide association studies with an application to breast cancer
Source: PubMed Central journal article supplement (PMC9871010; doi:10.1038/s41467-023-35888-4), 2023-01-23
Supplement: 41467_2023_35888_MOESM2_ESM.pdf [file 41467_2023_35888_MOESM2_ESM.pdf]

**File name: Supplementary Data 1**

**Description:** Genes associated with breast cancer at FDR < 0.10 using the MiXcan or PrediXcan approaches in 58,648 women, and the corresponding S-PrediXcan results in a larger sample of 228,951 women of European ancestry.

**File name: Supplementary Data 2**

**Description:** MiXcan GReX prediction models for genes significantly associated with breast cancer risk.
